# Supplementary material for: Infectious diseases as a cause of death among cancer patients: a trend analysis and population-based study of outcome in the United States based on the Surveillance, Epidemiology, and End Results database
Source: PubMed Central journal article supplement (PMC8719405; doi:10.1186/s13027-021-00413-z), 2021-12-31

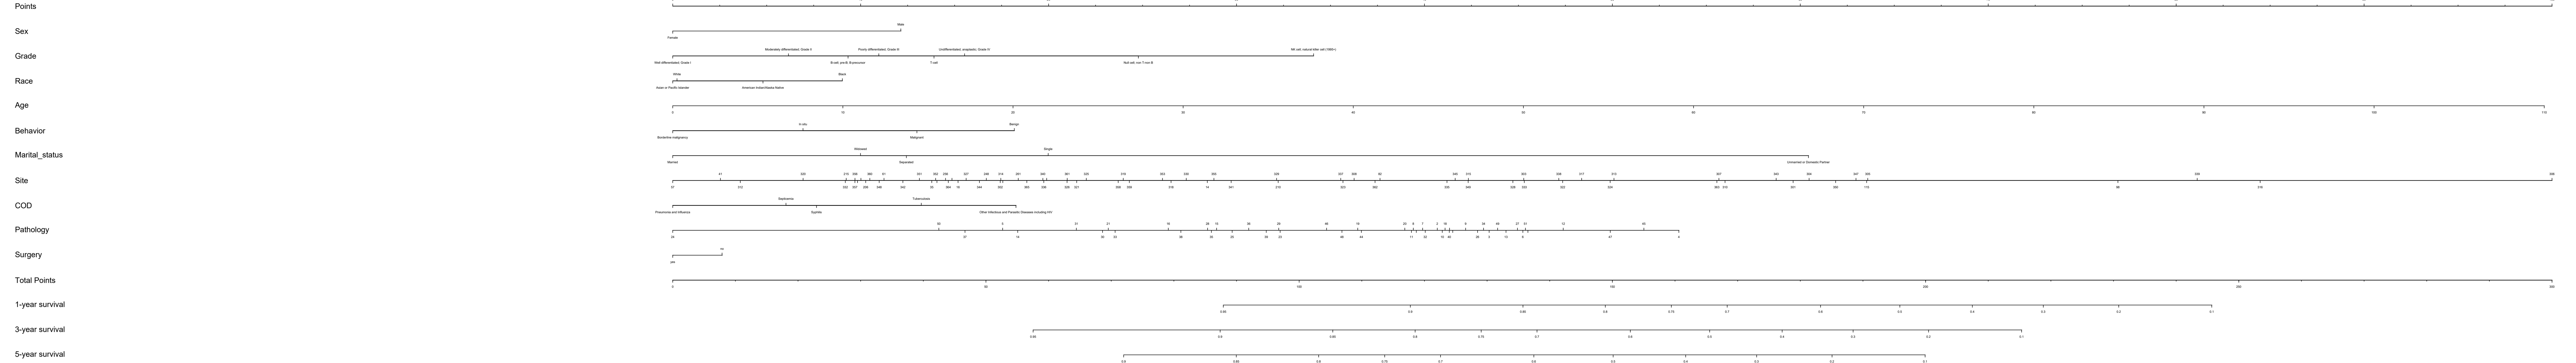

Supplement: 13027_2021_413_MOESM1_ESM.pdf [file 13027_2021_413_MOESM1_ESM.pdf]
